# Supplementary material
Source: Royal Society of Chemistry journal article supplement (https://www.rsc.org/suppdata/cc/1999/2479/906726d.doc)
Supplement: Supplementary file 1 [file 906726d.doc]

**Supplementary Materials**

**Anodic and cathodic electrografting of alkynes on porous silicon**

Edward G. Robins, Michael P. Stewart and Jillian M. Buriak*

Department of Chemistry, Purdue University, West Lafayette, IN 47907-1393.

**Experimental.** Samples of porous silicon (1.12 cm2) are prepared as previously reported (ref. 3b) by anodization of prime grade n-type, P-doped, 0.65 - 0.95 .cm silicon with a 24% HF/24% H2O/52% ethanol solution for 3 minutes at +76 mA cm-2 current under *ca*. 25 mW cm-2 white light illumination. The applied current was controlled using an EG & G Instruments, Princeton Applied Research Potentiostat/Galvanostat Model 363 instrument in constant current mode. After anodization samples are washed with ethanol and hexane before being dried under a stream of nitrogen. Electrochemical grafting is carried out in a Vacuum Atmospheres Nexus One glove box filled with nitrogen. AEG and CEG carried out on porous silicon under ambient conditions results in large-scale oxidation of the surface; surface oxidation appears to be in competition with the alkyne grafting. An ohmic contact is established between the backside of the por-Si sample and a sheet of heavy Al foil. A 35-40 l aliqot of alkyne and 1 ml of 0.1 M tetrabutylammonium hexafluorophosphate in CH2Cl2 are applied to the porous silicon sample and a platinum loop is used as the counter electrode. A current is then applied (+9 mA cm-2 for AEG, -9 mA cm-2 for CEG), typically for 120 seconds. Afterwards, the sample is removed from the glove box, and gently washed with CH2Cl2/pentane and dried under a nitrogen stream. The porous silicon surfaces are then characterized by transmission mode FT-IR spectroscopy.

**FTIR.** FT-IR spectra were recorded using either a Perkin-Elmer 2000 or a Nicolet Nexus 670 FT-IR spectrometer with DTGS detector, in transmission mode, typically 4 cm-1 resolution with 16 or 32 scans collected respectively.

**PL.** Photoluminescence (PL) measurements were recorded using an Oriel 250 W mercury arc lamp and a Bausch and Lomb monochromator set to 450 nm as the excitation source. Emission was observed through a 495 nm LWP filter (GG 495) with an Acton Research Spectra Pro 275 monochromator (0.275 m) and Princeton Instruments liquid N2 cooled CCD detector (model LN/CCD-1024-E/1).

**Syntheses of 1-phenyl-2-(trimethylsilyl)acetylene and 1-trimethylsilyldodecyne** were achieved using a method similar to that reported C. Eaborn and D. R. M. Walton, *J. Organomet. Chem.,* 1965, **4**, 217, reaction conditions which are directly analogous to the that reported by Weber in W. P. Weber, *Silicon Reagents for Organic Synthesis*, Springer-Verlag, New York 1983, p150.
